# Supplementary material for: Extremely low frequency electromagnetic field affects virulence and antibiotic susceptibility of multidrug resistant Pseudomonas aeruginosa and methicillin resistant Staphylococcus aureus
Source: Research Square preprint supplement (doi:10.21203/rs.3.rs-6791184/v1), 2025-07-01
Supplement: Supplementary file 1 [file 6c62a5c67a3bc5f2105975d0.docx]

**Extremely low frequency electromagnetic field affects virulence and antibiotic susceptibility of multidrug resistant *Pseudomonas aeruginosa* and methicillin resistant *Staphylococcus aureus***

Mohamed Hosny1, Mostafa Elnakib2✉,

1Microbiology and Immunology Department, Faculty of Pharmacy, Ain Shams University, Cairo, Egypt

2Microbiology and Immunology Department, Military Medical Academy, Cairo, Egypt.

**Corresponding author**

Mostafa Elnakib, MD

Professor of Microbiology and Immunology

Email: moselnakib@yahoo.com

**S1 table. Effect of ELF-EMF* on protease production of *Pseudomonas aeruginosa* isolates as determined by gelatin agar method**

|  | **Diameter of clearance zone (mm)** | | | |
| --- | --- | --- | --- | --- |
| **Isolate code** | **Before exposure** | **After 6 h exposure** | **After 12 h exposure** |
| *P1* | 20 | 7 | 0 |
| *P2* | 18 | 9 | 7 |
| *P3* | 21 | 20 | 20 |
| *P4* | 20 | 10 | 9 |
| *P5* | 19 | 10 | 7 |

*** ELF-EMF was used at 0.7 Hz frequency**

**S2 table. Effect of ELF-EMF* on oxidase production of *Pseudomonas aeruginosa* isolates**

| **Oxidase production** | | |  |
| --- | --- | --- | --- |
| **After 12 h exposure** | **After 6 h exposure** | **Before exposure** | **Isolate code** |
| ++ | ++ | ++ | *P1* |
| + | ++ | ++ | *P2* |
| + | + | ++ | *P3* |
| + | + | ++ | *P4* |
| + | ++ | ++ | *P5* |

*** ELF-EMF was used at 0.7 Hz frequency**

**The plus signs indicate the rate of oxidase production as follows:**

**++, oxidase disc color changes to deep purple color occurring within 10 sec;**

**+, the disc color changes to deep purple color occurring in more than 10 sec and up to 30 sec**

**S3 table. Effect of ELF-EMF* on biofilm formation by *Pseudomonas aeruginosa* as determined in microtiter plate and crystal violet staining method**

| **Reading replicate** | **Absorbance (OD570nm) obtained the test isolates** | | | | | | | | | | | | | | |
| --- | --- | --- | --- | --- | --- | --- | --- | --- | --- | --- | --- | --- | --- | --- | --- |
| *P1* | | | *P2* | | | *P3* | | | *P4* | | | *P5* | | |
| Before | After 6 h | After 12 h | Before | After 6 h | After 12 h | Before | After 6 h | After 12 h | Before | After 6 h | After 12 h | Before | After 6 h | After 12 h |
| 1 | 0.23 | 0.141 | 0.057 | 0.14 | 0.071 | 0.04 | 0.056 | 0.023 | 0.013 | 0.283 | 0.186 | 0.065 | 0.132 | 0.054 | 0.052 |
| 2 | 0.23 | 0.146 | 0.061 | 0.141 | 0.071 | 0.043 | 0.037 | 0.019 | 0.01 | 0.264 | 0.17 | 0.058 | 0.129 | 0.047 | 0.043 |
| 3 | 0.26 | 0.159 | 0.066 | 0.145 | 0.077 | 0.047 | 0.04 | 0.018 | 0.008 | 0.278 | 0.2 | 0.068 | 0.139 | 0.056 | 0.055 |
| 4 | 0.197 | 0.125 | 0.054 | 0.149 | 0.076 | 0.052 | 0.061 | 0.026 | 0.015 | 0.231 | 0.141 | 0.049 | 0.118 | 0.068 | 0.068 |
| 5 | 0.23 | 0.137 | 0.058 | 0.149 | 0.082 | 0.048 | 0.053 | 0.021 | 0.012 | 0.185 | 0.185 | 0.064 | 0.148 | 0.062 | 0.056 |
| 6 | 0.3 | 0.174 | 0.108 | 0.143 | 0.07 | 0.053 | 0.059 | 0.023 | 0.012 | 0.241 | 0.155 | 0.059 | 0.149 | 0.052 | 0.052 |
| **Average** | 0.241 | 0.147 | 0.067 | 0.144 | 0.074 | 0.047 | 0.051 | 0.021 | 0.011 | 0.247 | 0.172 | 0.0605 | 0.135 | 0.056 | 0.054 |

***ELF-EMF was used at 0.7 Hz frequency**

**S4 table. Effect of ELF-EMF(a) on coagulase production by *Staphylococcus aureus* isolates (MRSA) as determined by tube coagulase test**

| **Time Inter-val(b) (h)** | **Clot formation before and after exposure to ELF-EMF by the test isolates** | | | | | | | | | | | | | | | | | |
| --- | --- | --- | --- | --- | --- | --- | --- | --- | --- | --- | --- | --- | --- | --- | --- | --- | --- | --- |
| *S1* | | | *S2* | | | *S3* | | | *S4* | | | *S5* | | | *S6* | | |
| Before | After 6 h | After 12 h | Before | After 6 h | After 12 h | Before | After 6 h | After 12 h | Before | After 6 h | After 12 h | Before | After 6 h | After 12 h | Before | After 6 h | After 12 h |
| 0.5 | - | - | - | - | - | - | - | - | - | - | - | - | - | - | - | - | - | - |
| 1 | - | - | - | - | - | - | - | - | - | - | - | - | - | - | - | - | - | - |
| 1.5 | - | - | - | + | + | - | - | - | - | + | + | - | + | + | + | - | - | - |
| 2 | + | + | - | + | + | - | + | + | - | + | + | + | + | + | + | + | + | + |
| 2.5 | + | + | + | ++ | ++ | - | + | + | + | ++ | ++ | + | ++ | ++ | ++ | + | + | + |
| 3 | ++ | ++ | + | ++ | ++ | + | ++ | ++ | + | ++ | ++ | ++ | ++ | ++ | ++ | ++ | ++ | + |
| 3.5 | ++ | ++ | ++ | ++ | ++ | + | ++ | ++ | + | ++ | ++ | ++ | ++ | ++ | ++ | ++ | ++ | + |
| 4 | +++ | +++ | ++ | +++ | +++ | ++ | +++ | +++ | ++ | +++ | +++ | ++ | +++ | +++ | ++ | +++ | +++ | ++ |

**(a) ELF-EMF was used at 0.8 Hz frequency**

**(b) Time elapsed after addition of test isolate to plasma**

**-, no evidence of fibrin formation; +, small unorganized clots; ++, large clot; +++, entire contents of the tube are coagulated and are not displaced when the tube inverted**

**S5 table. Effect of ELF-EMF* on catalase production by *Staphylococcus aureus* isolates**

|  | **Catalase production** | | |
| --- | --- | --- | --- |
| **Isolate code** | **Before exposure** | **After 6 h exposure** | **After 12 h exposure** |
| *S1* | + | + | + |
| *S2* | + | + | + |
| *S3* | + | + | + |
| *S4* | + | + | + |
| *S5* | + | + | + |
| *S6* | + | + | + |

*** ELF-EMF was used at 0.8 Hz frequency**

**+, catalase production evident by immediate effervescence**

**S6 table. Effect of ELF-EMF* on biofilm formation by *Staphylococcus aureus* as determined in microtiter plate and crystal violet staining method**

| **Reading replicate** | **Absorbance (OD570nm) obtained by the test isolates** | | | | | | | | | | | | | | | | | | |
| --- | --- | --- | --- | --- | --- | --- | --- | --- | --- | --- | --- | --- | --- | --- | --- | --- | --- | --- | --- |
| *S1* | | | *S2* | | | *S3* | | | *S4* | | | *S5* | | | *S6* | | | |
| Before | After 6 h | After 12 h | Before | After 6 h | After 12 h | Before | After 6 h | After 12 h | Before | After 6 h | After 12 h | Before | After 6 h | After 12 h | Before | After 6 h | After 12 h |
| 1 | 0.163 | 0.076 | 0.048 | 0.185 | 0.048 | 0.012 | 0.171 | 0.106 | 0.032 | 0.065 | 0.059 | 0.022 | 0.055 | 0.031 | 0.026 | 0.186 | 0.078 | 0.026 |
| 2 | 0.176 | 0.079 | 0.048 | 0.241 | 0.034 | 0.015 | 0.167 | 0.115 | 0.02 | 0.052 | 0.045 | 0.02 | 0.031 | 0.08 | 0.022 | 0.17 | 0.073 | 0.026 |
| 3 | 0.145 | 0.066 | 0.042 | 0.284 | 0.056 | 0.019 | 0.188 | 0.124 | 0.039 | 0.068 | 0.059 | 0.027 | 0.052 | 0.034 | 0.029 | 0.2 | 0.093 | 0.032 |
| 4 | 0.104 | 0.0509 | 0.0305 | 0.231 | 0.038 | 0.014 | 0.147 | 0.092 | 0.034 | 0.043 | 0.037 | 0.014 | 0.062 | 0.038 | 0.034 | 0.181 | 0.086 | 0.036 |
| 5 | 0.187 | 0.095 | 0.054 | 0.288 | 0.046 | 0.017 | 0.163 | 0.091 | 0.029 | 0.064 | 0.057 | 0.023 | 0.063 | 0.043 | 0.029 | 0.185 | 0.085 | 0.023 |
| 6 | 0.175 | 0.0805 | 0.038 | 0.264 | 0.048 | 0.017 | 0.152 | 0.103 | 0.027 | 0.059 | 0.049 | 0.015 | 0.047 | 0.028 | 0.023 | 0.19 | 0.078 | 0.042 |
| **Average** | 0.158 | 0.074 | 0.043 | 0.248 | 0.045 | 0.015 | 0.164 | 0.105 | 0.0301 | 0.0585 | 0.051 | 0.0201 | 0.0516 | 0.042 | 0.027 | 0.185 | 0.082 | 0.0308 |

***ELF-EMF was used at 0.8 Hz frequency**

**S7 table. Antibiotic susceptibility of *P. aeruginosa* isolates after exposure to ELF-EMF* as compared with unexposed control cultures**

| **Antibiotic** | **Inhibition zone diameter (mm) obtained before and after exposure to ELF-EMF by the test isolate** | | | | | | | | | | | | | | |
| --- | --- | --- | --- | --- | --- | --- | --- | --- | --- | --- | --- | --- | --- | --- | --- |
| *P1* | | | *P2* | | | *P3* | | | *P4* | | | *P5* | | |
| Before | After 6 h | After 12 h | Before | After 6 h | After 12 h | Before | After 6 h | After 12 h | Before | After 6 h | After 12 h | Before | After 6 h | After 12 h |
| Piperacillin-tazobactam (TZP) | 8 | 9 | 11 | 8 | 13 | 16 | 5 | 9 | 12 | 5 | 9 | 12 | 8 | 8 | 11 |
| Meropenem (MEM) | 5 | 5 | 5 | 6 | 8 | 8 | 5 | 5 | 13 | 5 | 5 | 5 | 5 | 5 | 5 |
| Ciprofloxacin (CIP) | 5 | 5 | 5 | 6 | 6 | 6 | 8 | 8 | 9 | 5 | 5 | 5 | 5 | 5 | 5 |
| Amikacin (AK) | 5 | 5 | 5 | 5 | 5 | 5 | 8 | 8 | 8 | 5 | 5 | 5 | 5 | 5 | 5 |
| Ceftazidime (CAZ) | 5 | 5 | 5 | 5 | 5 | 5 | 5 | 5 | 5 | 5 | 5 | 5 | 5 | 5 | 5 |
| Cefepime (FEP) | 5 | 5 | 5 | 5 | 5 | 5 | 8 | 10 | 10 | 5 | 5 | 5 | 5 | 5 | 5 |
| Levofloxacin (LEV) | 5 | 5 | 5 | 5 | 5 | 5 | 5 | 5 | 5 | 5 | 5 | 5 | 5 | 5 | 5 |
| Nitrofurantoin (NI) | 5 | 5 | 5 | 5 | 5 | 5 | 5 | 5 | 5 | 5 | 5 | 5 | 5 | 5 | 5 |
| Gentamicin (Cn) | 5 | 5 | 5 | 6 | 5 | 5 | 5 | 5 | 5 | 5 | 5 | 5 | 5 | 5 | 5 |

***ELF-EMF was used at 0.7 Hz frequency**

**S8 table. Antibiotic susceptibility of *S. aureus* isolates after exposure to ELF-EMF* as compared with unexposed control cultures**

| **Antibiotic** | **Inhibition zone diameter (mm) obtained before and after exposure to ELF-EMF by the test isolate** | | | | | | | | | | | | | | | | | |
| --- | --- | --- | --- | --- | --- | --- | --- | --- | --- | --- | --- | --- | --- | --- | --- | --- | --- | --- |
| *S1* | | | *S2* | | | *S3* | | | *S4* | | | *S5* | | | *S6* | | |
| Before | After 6 h | After 12 h | Before | After 6 h | After 12 h | Before | After 6 h | After 12 h | Before | After 6 h | After 12 h | Before | After 6 h | After 12 h | Before | After 6 h | After 12 h |
| Amoxicillin/clavulanic acid (AMC) | 8 | 11 | 11 | 5 | 5 | 5 | 5 | 10 | 11 | 5 | 5 | 12 | 5 | 9 | 11 | 8 | 8 | 12 |
| Levofloxacin (LEV) | 18 | 24 | 25 | 20 | 22 | 25 | 5 | 5 | 12 | 25 | 25 | 25 | 5 | 5 | 14 | 18 | 20 | 28 |
| Linezolid  (LZD) | 25 | 25 | 26 | 21 | 23 | 26 | 22 | 27 | 30 | 26 | 26 | 27 | 22 | 27 | 30 | 24 | 24 | 26 |
| Clindamycin  (CD) | 20 | 22 | 23 | 14 | 15 | 17 | 5 | 5 | 5 | 5 | 5 | 5 | 5 | 5 | 5 | 12 | 16 | 19 |
| Cefoxitin  (FOX) | 12 | 12 | 15 | 12 | 12 | 12 | 5 | 5 | 5 | 12 | 12 | 13 | 5 | 5 | 5 | 5 | 5 | 12 |
| Ciprofloxacin  (CIP) | 21 | 25 | 25 | 21 | 21 | 24 | 5 | 5 | 5 | 21 | 27 | 27 | 14 | 14 | 14 | 18 | 21 | 21 |
| Gentamicin  (Cn) | 5 | 5 | 5 | 5 | 5 | 5 | 5 | 5 | 5 | 5 | 5 | 5 | 5 | 5 | 5 | 5 | 5 | 5 |
| Clarithromycin  (CLR) | 18 | 22 | 22 | 20 | 20 | 24 | 8 | 8 | 12 | 5 | 5 | 8 | 5 | 9 | 12 | 24 | 26 | 28 |
| Ampicillin  (Amp) | 5 | 5 | 5 | 5 | 5 | 5 | 5 | 5 | 5 | 5 | 5 | 5 | 5 | 5 | 5 | 5 | 5 | 5 |
| Oxacillin  (Ox) | 5 | 5 | 11 | 5 | 5 | 10 | 5 | 5 | 5 | 5 | 5 | 5 | 5 | 5 | 5 | 5 | 5 | 10 |
| Penecillin G  (P) | 5 | 5 | 8 | 5 | 5 | 10 | 5 | 5 | 5 | 5 | 5 | 11 | 5 | 5 | 5 | 5 | 5 | 10 |
| Methicillin  (Met) | 5 | 5 | 5 | 5 | 5 | 10 | 5 | 5 | 5 | 5 | 5 | 5 | 5 | 5 | 5 | 5 | 5 | 8 |

***ELF-EMF was used at 0.8 Hz frequency**

**S9 table. Variant genes resulted from missense mutations produced upon exposure of *P. aeruginosa P4* to ELF-EMF for 6 h in comparison to the parent isolate before exposure.**

| **Protein change** | **Genomic change** | **Length** | **Protein name** | **Gene name** |
| --- | --- | --- | --- | --- |
| 200V>200E | 290406A>T | 480 | DUF2875 domain-containing protein | PA0259 |
| 251G>251D | 296110C>T | 1019 | Type VI secretion system spike protein VgrG2b (Metallopeptidase effector VgrG2b) (EC 3.4.24.-) | vgrG2b PA0262 |
| 453D>453K | 531079G>C+531081C>T | 802 | Ferrichrome receptor FiuA | fiuA PA0470 |
| 2261E>2261V | 756738A>T | 4180 | Haemagg_act domain-containing protein | PA0690 |
| 134D>134N | 1064704C>T | 182 | Thioredoxin-like_fold domain-containing protein | PA0982 |
| 128D>128N | 1183439G>A+1183441T>C | 488 | B-type flagellin | fliC PA1092 |
| 88I>88T | 1184865T>C | 123 | Flagellar biosynthesis protein FlaG | PA1093 |
| 301Q>301L | 1185961A>T | 474 | B-type flagellar hook-associated protein 2 (HAP2) (Filament cap protein) (Flagellar cap protein) | fliD  PA1094 |
| 27R>27L | 1390304G>T | 351 | Nicotinate-nucleotide--dimethylbenzimidazole phosphoribosyltransferase (NN:DBI PRT) (EC 2.4.2.21) (N(1)-alpha-phosphoribosyltransferase) | cobT cobU PA1279 |
| 233T>233A | 1540435T>C | 460 | FAD-binding PCMH-type domain-containing protein | PA1416 |
| 1569I>1569M | 2041147C>G | 2468 | BapA prefix-like domain-containing protein | PA1874 |
| 16R>16H | 2583529G>A | 310 | Probable binding-protein-dependent maltose/mannitol transport protein | PA2339 |
| 50D>50E | 2648261A>C | 544 | PvdP | pvdP PA2392 |
| 193Y>193H | 2652481A>G | 275 | Pyoverdine synthetase F | pvdF PA2396 |
| 335L>335F | 2664142G>A | 2448 | Pyoverdine synthetase D | pvdD PA2399 |
| 876M>876L | 2669002C>A+2669004T>G | 2157 | PvdJ | PvdJ PA2400 |
| 2859A>2859V | 2678603G>A | 5149 | Probable non-ribosomal peptide synthetase | PA2402 |
| 2305A>2305V | 2713781G>A | 4342 | PvdL | pvdL PA2424 |
| 645G>645S | 2726207T>G+2726209C>T | 724 | FUSC family protein | PA2431 |
| 265R>265K | 2998633G>A | 269 | Methyltransf_11 domain-containing protein | PA2650 |
| 56K>56Q | 3120238A>C+3120240G>A | 425 | Probable outer membrane protein | PA2760 |
| 76D>76G | 4349728A>G | 276 | Probable short-chain dehydrogenase | PA3883 |
| 194A>194S | 5042647G>T | 336 | Probable permease of ABC transporter | PA4503 |
| 1483K>1483R | 5188428T>C | 2154 | Haemagg_act domain-containing protein | PA4625 |
| 28I>28V | 5727155T>G+5727157T>C | 293 | Sel1 repeat family protein | PA5088 |
| 278S>278P | 5915270A>G | 352 | Transcriptional regulatory protein AlgP (Alginate regulatory protein AlgR3) | algP algR3 PA5253 |
| 16H>16R | 5988127A>G | 182 | DUF2867 domain-containing protein | PA5318 |

**S10 table. Variant genes resulted from missense mutations produced upon exposure of *P. aeruginosa P4* to ELF-EMF for 12 h in comparison to the parent isolate before exposure.**

| **Protein change** | **Genomic change** | **Length** | **Protein name** | **Gene name** |
| --- | --- | --- | --- | --- |
| 163T>163A | 41599A>G | 562 | POTRA domain-containing protein | PA0040 |
| 1251R>1251H | 46665G>A | 3535 | Probable hemagglutinin | PA0041 |
| 207H>207R | 164450T>C | 208 | Nucleoside 2-deoxyribosyltransferase | PA0144 |
| 136A>136T | 283146C>G+283148C>T | 213 | SUFU domain-containing protein | PA0251 |
| 200V>200E | 290406A>T | 480 | DUF2875 domain-containing protein | PA0259 |
| 100I>100T | 628372A>G | 111 | NERD domain-containing protein | PA0573 |
| 110V>110A | 694749T>C | 200 | Probable bacteriophage protein | PA0640 |
| 2261E>2261V | 756738A>T | 4180 | Haemagg_act domain-containing protein | PA0690 |
| 134D>134N | 1064704C>T | 182 | Thioredoxin-like_fold domain-containing protein | PA0982 |
| 233A>233V | 1069186C>T | 280 | Integrase catalytic domain-containing protein | PA0987 |
| 340T>340R | 1175258C>G | 439 | Flagellar hook-associated protein type 3 FlgL | flgL PA1087 |
| 128D>128N | 1183439G>A+1183441T>C | 488 | B-type flagellin | fliC PA1092 |
| 27R>27L | 1390304G>T | 351 | Nicotinate-nucleotide--dimethylbenzimidazole phosphoribosyltransferase (NN:DBI PRT) (EC 2.4.2.21) (N(1)-alpha-phosphoribosyltransferase) | cobT cobU PA1279 |
| 233T>233A | 1540435T>C | 460 | FAD-binding PCMH-type domain-containing protein | PA1416 |
| 50R>50K | 1643877C>T | 842 | Type VI secretion system spike protein VgrG2a | vgrG2a PA1511 |
| 1569I>1569M | 2041147C>G | 2468 | BapA prefix-like domain-containing protein | PA1874 |
| 131V>131I | 2419113G>A+2419115A>C | 531 | cyclic-guanylate-specific phosphodiesterase (EC 3.1.4.52) | PA2200 |
| 11A>11T | 2527247C>T | 468 | Nitrate ABC transporter substrate-binding protein | PA2296 |
| 50D>50E | 2648261A>C | 544 | PvdP | pvdP PA2392 |
| 46Q>46R | 2652921T>C | 275 | Pyoverdine synthetase F | pvdF PA2396 |
| 1396L>1396F | 2660959G>A | 2448 | Pyoverdine synthetase D | pvdD PA2399 |
| 2859A>2859V | 2678603G>A | 5149 | Probable non-ribosomal peptide synthetase | PA2402 |
| 2305A>2305V | 2713781G>A | 4342 | PvdL | pvdL PA2424 |
| 645G>645S | 2726207T>G+2726209C>T | 724 | FUSC family protein | PA2431 |
| 415I>415L | 2965558A>G+2965560T>G | 418 | Isocitrate dehydrogenase [NADP] (EC 1.1.1.42) | icd PA2623 |
| 265R>265K | 2998633G>A | 269 | Methyltransf_11 domain-containing protein | PA2650 |
| 56K>56Q | 3120238A>C+3120240G>A | 425 | Probable outer membrane protein | PA2760 |
| 271I>271V | 3611060A>G | 299 | EamA family transporter | PA3222 |
| 194A>194S | 5042647G>T | 336 | Probable permease of ABC transporter | PA4503 |
| 64I>64L | 5726159T>G | 289 | Sel1 repeat family protein | PA5087 |

**S11 table. Variant genes resulted from missense mutations produced upon exposure of *S. aureus* *S3* to ELF-EMF for 6 h in comparison to the parent isolate before exposure.**

| **Protein change** | **Genomic change** | **Length** | **Protein name** | **Gene name** |
| --- | --- | --- | --- | --- |
| 335E>335D | 39374G>T | 355 | Rhodanese domain-containing protein | SAOUHSC_00035 |
| 395N>395D | 40650A>G | 444 | Rhodanese domain-containing protein | SAOUHSC_00036 |
| 167N>167K | 55962T>G | 255 | Uncharacterized lipoprotein SAOUHSC_00052 | SAOUHSC_00052 |
| 71I>71T | 58166T>C | 255 | Uncharacterized lipoprotein SAOUHSC_00055 | SAOUHSC_00055 |
| 23Q>23R | 123529A>G | 342 | Galactowaldenase (UDP-galactose 4-epimerase) | SAOUHSC_00118 |
| 253N>253K | 157960A>T | 254 | Acetylglutamate kinase (EC 2.7.2.8) (N-acetyl-L-glutamate 5-phosphotransferase) (NAG kinase) (NAGK) | argB SAOUHSC_00147 |
| 61T>61A | 256400A>G | 263 | PTS glucose transporter subunit IIABC | SAOUHSC_00235 |
| 128W>128R | 264761T>A+264763G>A | 134 | Truncated transposase | SAOUHSC_00245 |
| 151V>151I | 274510G>A+274512T>A | 195 | DUF5080 family protein | SAOUHSC_00255 |
| 122S>122T | 293436T>A | 166 | TIGR01741 family protein | SAOUHSC_00276 |
| 80R>80S | 293823A>C | 166 | TIGR01741 family protein | SAOUHSC_00277 |
| 3E>3D | 1247498A>T | 61 | DNA-binding protein | SAOUHSC_01292 |
| 7716A>7716T | 1381553C>T | 9535 | Extracellular matrix-binding protein ebh (ECM-binding protein homolog) | ebh SAOUHSC_01447 |
| 40C>40F | 1496261C>A | 68 | Conserved hypothetical phage protein | SAOUHSC_01557 |
| 4S>4N | 1496625C>T | 80 | PVL orf 51-like protein | SAOUHSC_01558 |
| 360V>360I | 1508369G>A+1508371T>A | 401 | Bacteriophage integrase | SAOUHSC_01582 |
| 8N>8K | 1926069A>T | 481 | Probable autolysin LytO (EC 3.5.1.28) | lytO SAOUHSC_02019 |
| 29V>29I | 1926426C>T | 145 | Holin | SAOUHSC_02020 |
| 532V>532A | 1928456A>G | 632 | Bifunctional autolysin (EC 3.5.1.28) | SAOUHSC_02023 |
| 107E>107D | 1950775T>G | 140 | Int gene activator RinA | SAOUHSC_02051 |
| 14L>14I | 1951415A>T | 62 | Transcriptional activator rinb-related protein | SAOUHSC_02053 |
| 94K>94N | 2034705C>A | 98 | Peptidoglycan hydrolase, putative | SAOUHSC_02170 |
| 13S>13T | 2059615A>T | 68 | Conserved hypothetical phage protein | SAOUHSC_02203 |
| 64E>64D | 2060410T>G | 178 | Conserved hypothetical phage protein | SAOUHSC_02205 |
| 14A>14T | 2060779C>T | 84 | Phi PVL/orf 52-like protein | SAOUHSC_02207 |
| 5F>5Y | 2061531A>T | 115 | Conserved hypothetical phage protein | SAOUHSC_02209 |
| 52Y>52N | 2063073A>T | 52 | Conserved hypothetical phage protein | SAOUHSC_02215 |
| 222K>222N | 2065271C>A | 223 | Phi ETA orf 20-like protein | SAOUHSC_02219 |
| 253Q>253E | 2066554G>C | 259 | Conserved hypothetical phage protein | SAOUHSC_02221 |
| 69K>69E | 2067320T>C | 73 | Conserved hypothetical phage protein | SAOUHSC_02222 |
| 51N>51K | 2069287A>T | 65 | Conserved hypothetical phage protein | SAOUHSC_02228 |
| 1121T>1121S | 2229199T>A | 2478 | FmtB protein | SAOUHSC_02404 |
| 48L>48P | 2560595A>G | 261 | Uncharacterized lipoprotein SAOUHSC_02788 | SAOUHSC_02788 |
| 57G>57E | 2702906C>T | 228 | Lactamase_B domain-containing protein | SAOUHSC_02936 |
| 12L>12H | 2714202T>A | 56 | Uncharacterized protein | SAOUHSC_A02795 |
| 260E>260D | 2733391C>A | 498 | Neutral metalloproteinase (EC 3.4.24.-) | SAOUHSC_02971 |
| 12V>12L | 2735445G>T+2735447A>G | 152 | Exported protein | SAOUHSC_02973 |
| 1267I>1267N | 2762945A>T | 2271 | Serine-rich adhesin for platelets (Adhesin SraP) (Staphylococcus aureus surface protein A) (SasA) | sraP sasA SAOUHSC_02990 |
| 230I>230R | 2767293A>C | 230 | Flavin_Reduct domain-containing protein | SAOUHSC_02991 |
| 9E>9V | 2810814T>A | 79 | Uncharacterized protein | SAOUHSC_03038 |
| 7S>7P | 2812102T>C | 116 | Integrase/recombinase, core domain family | SAOUHSC_03042 |
| 8N>8T | 2812571T>G | 79 | Uncharacterized protein | SAOUHSC_03043 |

**S12 table. Variant genes resulted from missense mutations produced upon exposure of *S. aureus S3* to ELF-EMF for 12 h in comparison to the parent isolate before exposure.**

| **Protein change** | **Genomic change** | **Length** | **Protein name** | **Gene name** |
| --- | --- | --- | --- | --- |
| 325E>325Q | 40440G>C | 444 | Rhodanese domain-containing protein | SAOUHSC_00036 |
| 140E>140D | 55881A>T | 255 | Uncharacterized lipoprotein SAOUHSC_00052 | SAOUHSC_00052 |
| 3I | 114561T>C | 161 | Replication initiation protein, putative | SAOUHSC_00109 |
| 269T>269R | 212537C>G | 636 | Coagulase | SAOUHSC_00192 |
| 61T>61A | 256400A>G | 263 | PTS glucose transporter subunit IIABC | SAOUHSC_00235 |
| 128W>128R | 264761T>A+264763G>A | 134 | Truncated transposase | SAOUHSC_00245 |
| 151V>151I | 274510G>A+274512T>A | 195 | DUF5080 family protein | SAOUHSC_00255 |
| 94L>94H | 293353T>A | 166 | TIGR01741 family protein | SAOUHSC_00276 |
| 84E>84D | 294346G>T | 162 | TIGR01741 family protein | SAOUHSC_00278 |
| 32R>32G | 401007A>G | 403 | Restriction modification system specificity subunit, putative | SAOUHSC_00398 |
| 132F>132L | 405860C>A | 262 | Uncharacterized lipoprotein SAOUHSC_00402 | SAOUHSC_00402 |
| 7696N>7696H | 1381611G>A+1381613T>G | 9535 | Extracellular matrix-binding protein ebh (ECM-binding protein homolog) | ebh SAOUHSC_01447 |
| 141K>141E | 1494466T>C | 180 | Bacteriophage L54a, deoxyuridine 5-triphosphate nucleotidohydrolase (EC 3.6.1.23) | SAOUHSC_01552 |
| 40C>40F | 1496261C>A | 68 | Conserved hypothetical phage protein | SAOUHSC_01557 |
| 4S>4N | 1496625C>T | 80 | PVL orf 51-like protein | SAOUHSC_01558 |
| 323N>323K | 1508260T>A | 401 | Bacteriophage integrase | SAOUHSC_01582 |
| 68D>68E | 1934610G>T | 636 | Phi ETA orf 56-like protein | SAOUHSC_02029 |
| 707F>707I | 2046569A>T+2046571A>T | 1550 | lysostaphin (EC 3.4.24.75) | SAOUHSC_02182 |
| 64E>64D | 2060410T>G | 178 | Conserved hypothetical phage protein | SAOUHSC_02205 |
| 51E>51A | 2063075T>G | 52 | Conserved hypothetical phage protein | SAOUHSC_02215 |
| 51N>51K | 2069287A>T | 65 | Conserved hypothetical phage protein | SAOUHSC_02228 |
| 21G>21V | 2560676C>A | 261 | Uncharacterized lipoprotein SAOUHSC_02788 | SAOUHSC_02788 |
| 12L>12H | 2714202T>A | 56 | Uncharacterized protein | SAOUHSC_A02795 |
| 223N>223D | 2724935T>C | 877 | Clumping factor B (Fibrinogen receptor B) (Fibrinogen-binding protein B) | clfB SAOUHSC_02963 |
| 228E>228N | 2767298T>G+2767300C>T | 230 | Flavin_Reduct domain-containing protein | SAOUHSC_02991 |
| 9E>9V | 2810814T>A | 79 | Uncharacterized protein | SAOUHSC_03038 |
